# Supplementary material for: Large-scale synthesis of porous carbon via one-step CuCl2 activation of rape pollen for high-performance supercapacitors
Source: Royal Society of Chemistry journal article supplement (doi:10.1039/c8ta02838a), 2018-01-01
Supplement: c8ta02838a1.pdf [file c8ta02838a1.pdf]

## Supporting Information

### **Large-scale synthesis of porous carbon via one-step CuCl<sub>2</sub> activation of rape pollen for high-performance supercapacitor**

Simin Liu, Yeru Liang, Wan Zhou, Wenqiang Hu, Hanwu Dong, Mingtao Zheng,

Hang Hu, Bingfu Lei, Yong Xiao\*, Yingliang Liu\*

College of Materials and Energy, South China Agricultural University, Guangzhou 510642, China

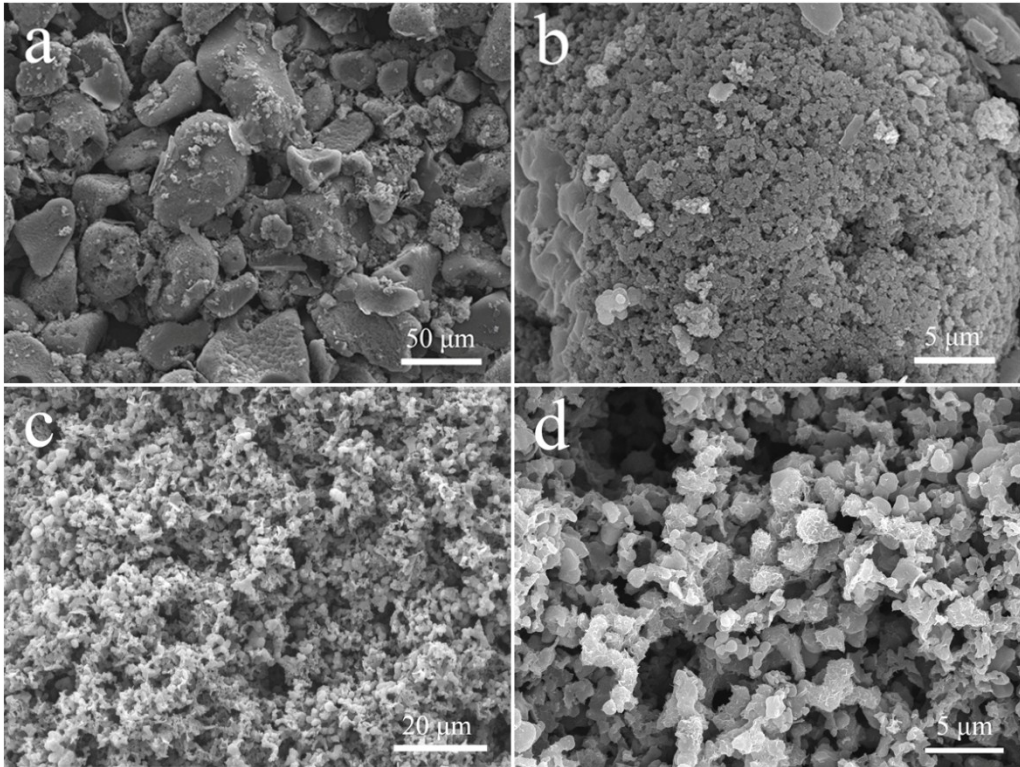

**Figure S1.** Different magnification SEM images (a, b) of Z-RPC. Different magnification SEM images (c, d) of K-RPC

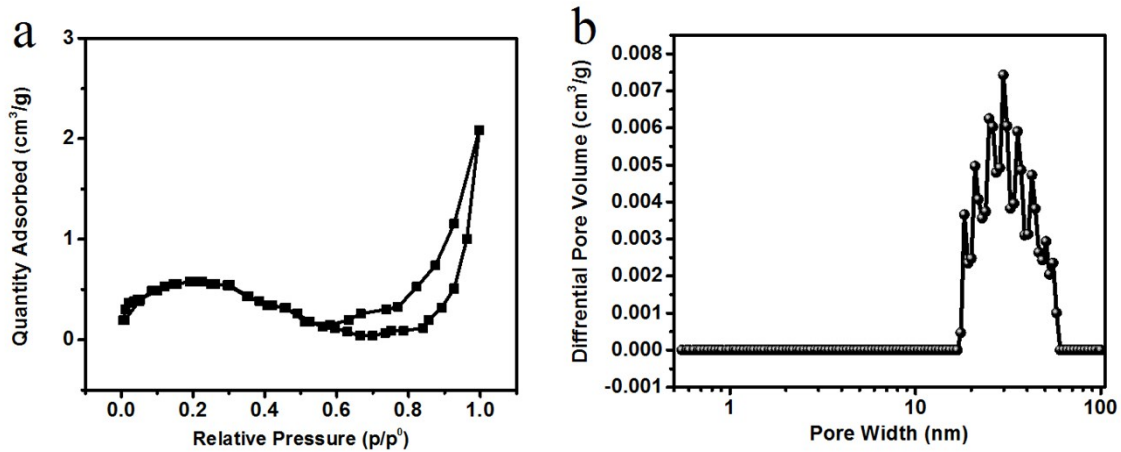

**Figure S2.** (a) N<sub>2</sub> adsorption-desorption curves of the Blank sample. (b) pore-size distribution (PSD) curves of the Blank sample.

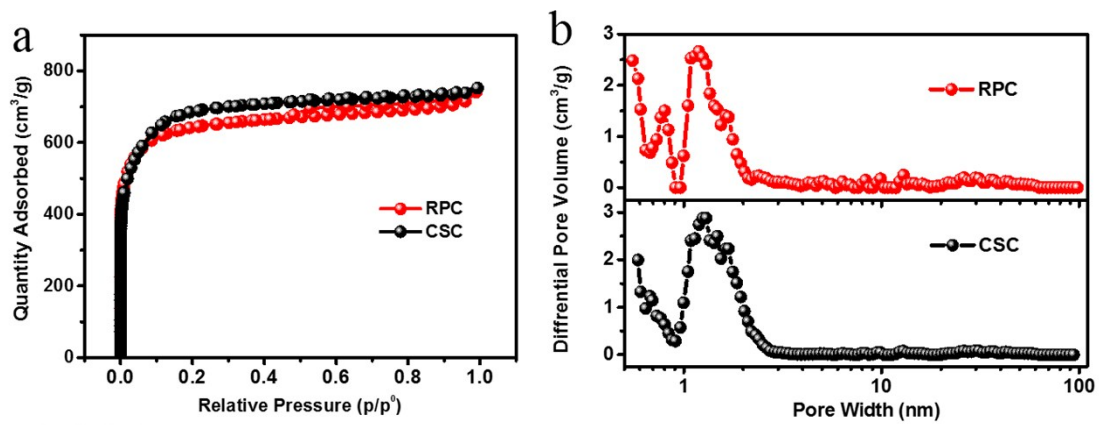

**Figure S3.** (a) N<sub>2</sub> adsorption-desorption curves of CSC and RPC. (b) pore-size distribution (PSD) curves of CSC and RPC.

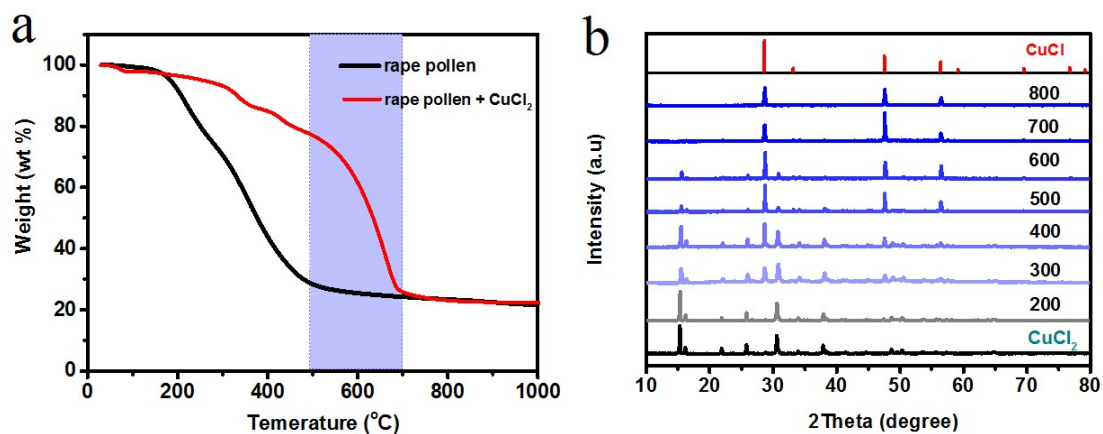

**Figure S4.** (a) The TGA curves of raw rape pollen and the mixture of rape pollen and CuCl<sub>2</sub> with weight ratio of 1:10 (rape pollen/ CuCl<sub>2</sub>). (b) XRD patterns of the mixture of rape pollen and CuCl<sub>2</sub> with weight ratio of 1:10 (rape pollen/ CuCl<sub>2</sub>) annealed at different temperatures (200 - 800 °C) in N<sub>2</sub> flow and without acid washing.

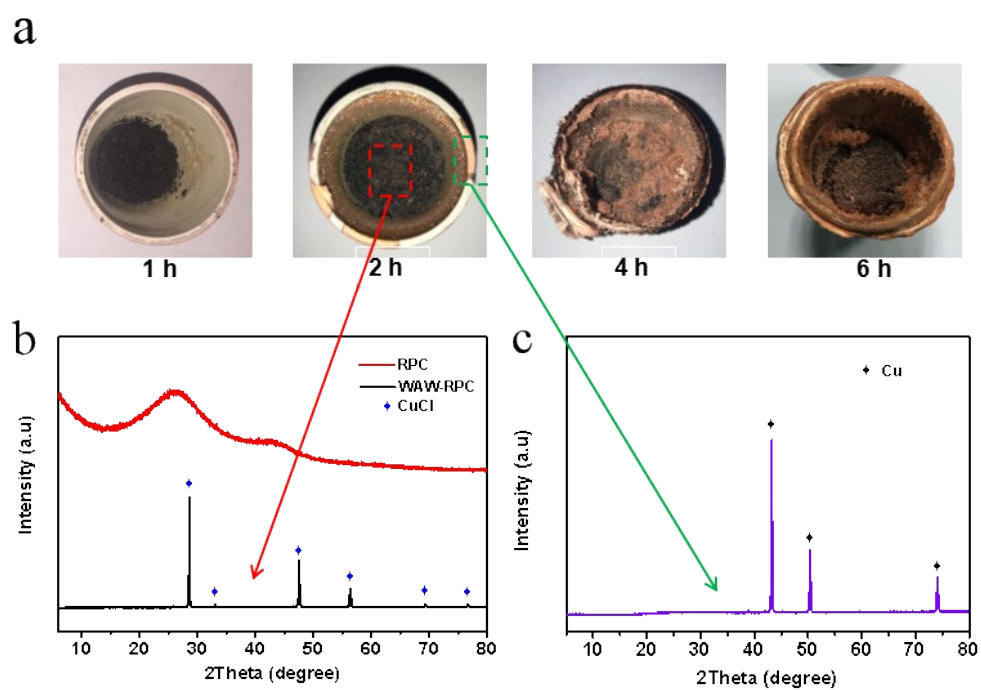

**Figure S5.** (a) image of WAW-RPC. (b) XRD patterns of WAW-RPC and RPC. (c) XRD patterns of the yellow product.

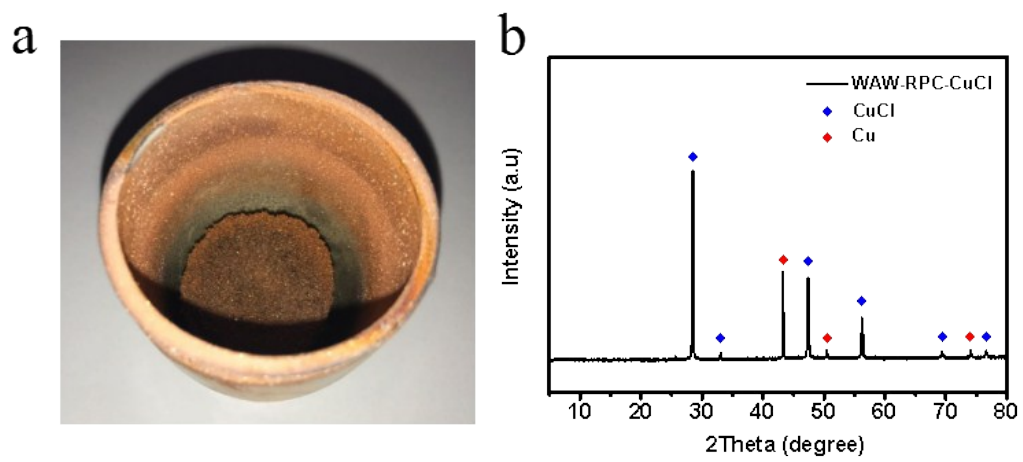

**Figure S6.** (a) image of WAW-RPC-CuCl. (b) XRD patterns of WAW-RPC-CuCl.

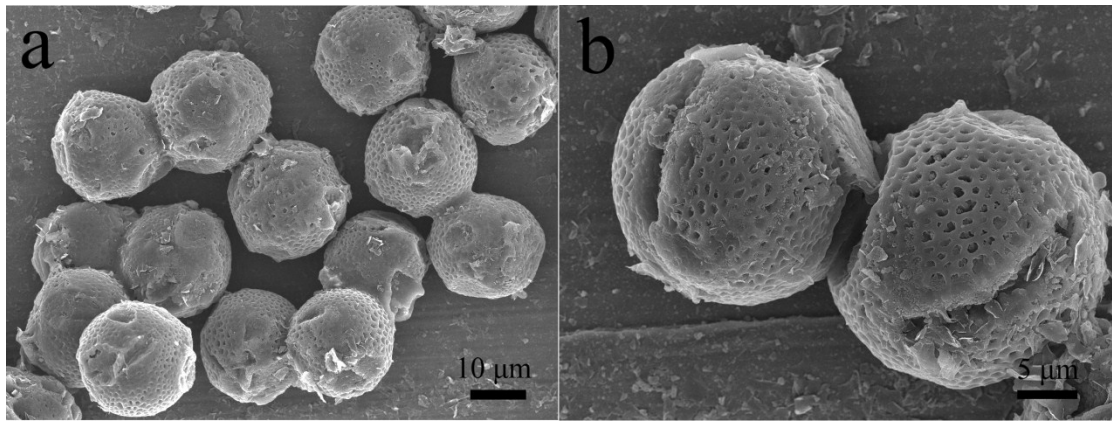

**Figure S7.** (a) SEM image of RPC-CuCl. (b) SEM image of RPC-CuCl at different magnification.



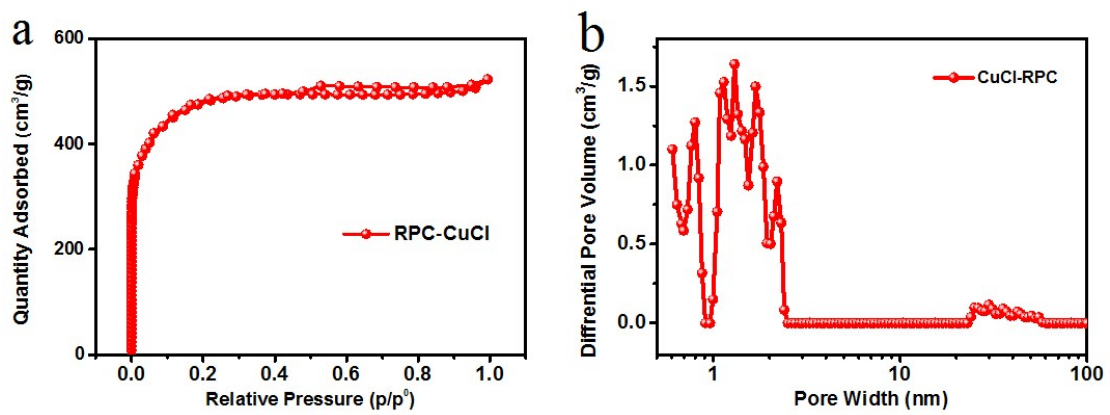

**Figure S8.** (a) N<sub>2</sub> adsorption-desorption curves of RPC-CuCl. (b) pore-size distribution (PSD) curves of RPC-CuCl.

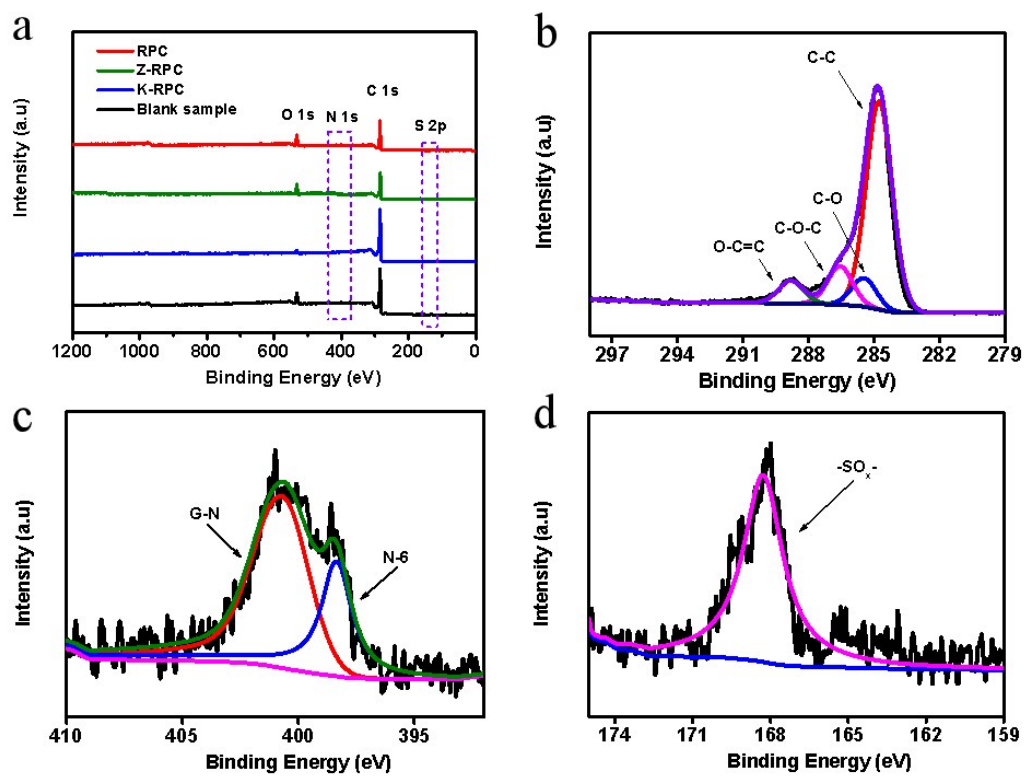

**Figure S9.** (a) XPS spectra of the samples. (b) high-resolution C1s of RPC. (c) High-resolution N 1s of RPC. (d) high-resolution S2p of RPC.

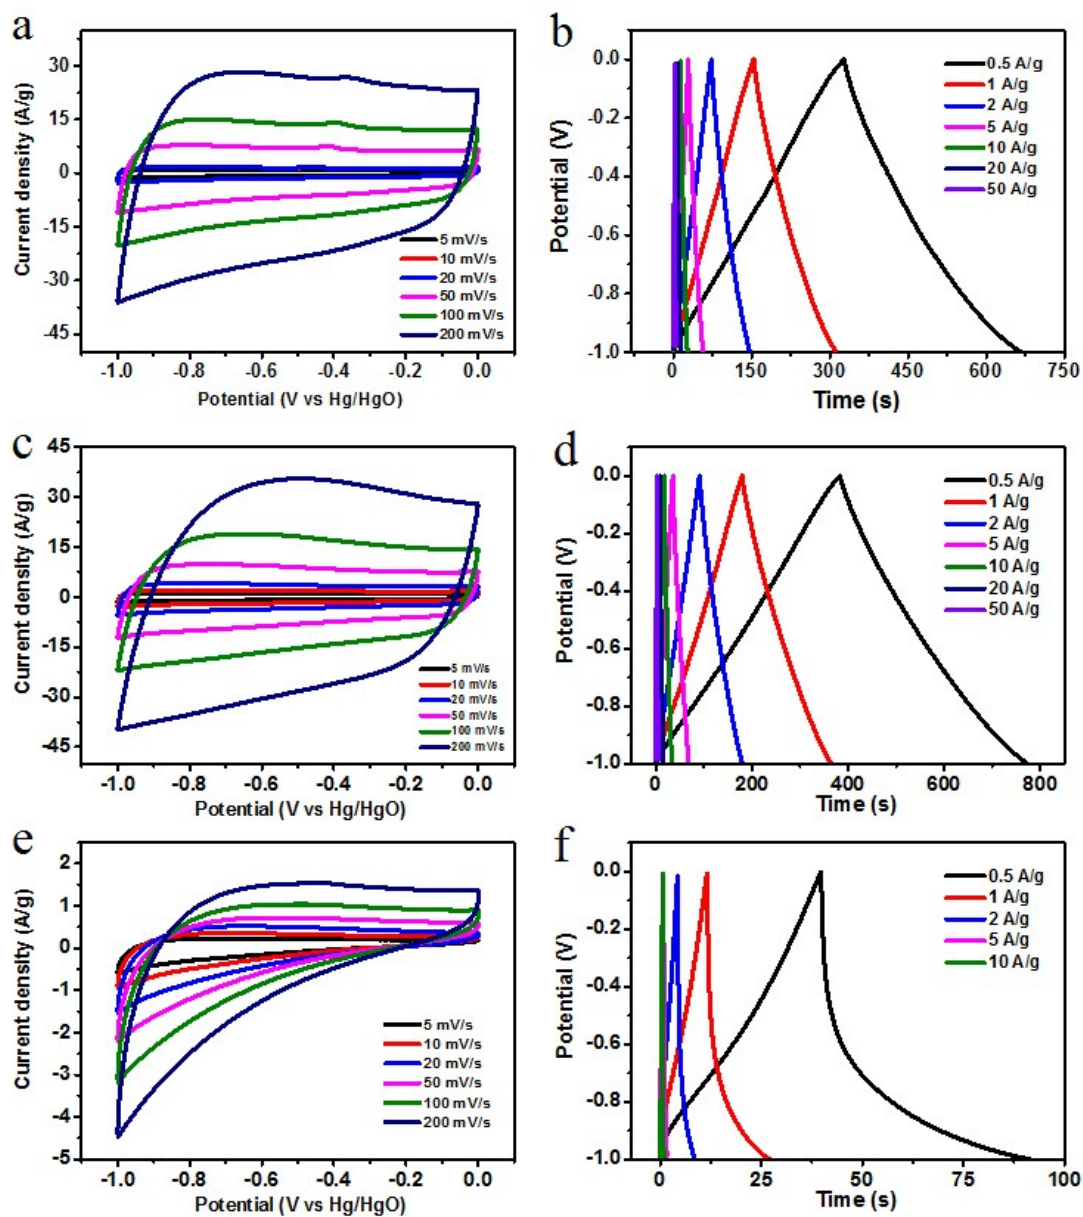

**Figure S10.** (a) CV curves of Z-RPC. (b) GCD curves of Z-RPC at different current density. (c) CV curves of K-RPC. (d) GCD curves of K-RPC at different current density. (e) CV curves of Blank sample. (f) GCD curves of Blank sample at different current density.

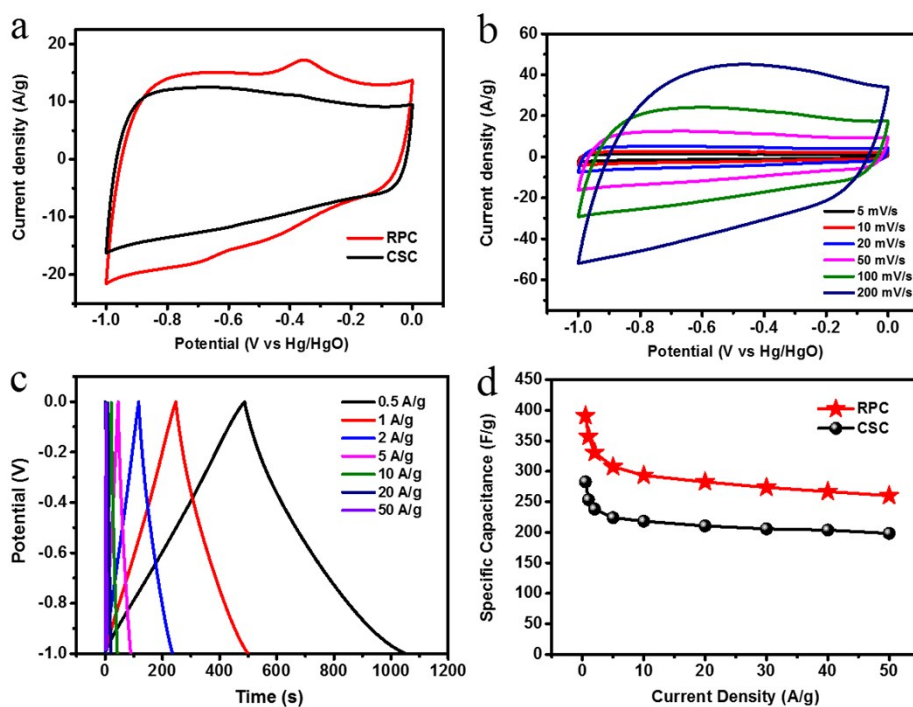

**Figure S11.** (a) CV curves of CSC and RPC at scan rate of  $50 \text{ mV s}^{-1}$ . (b) CV curves of CSC at different scan rate. (c) GCD curves of CSC at different current density. (d) Specific capacitance of CSC and RPC at different current density.

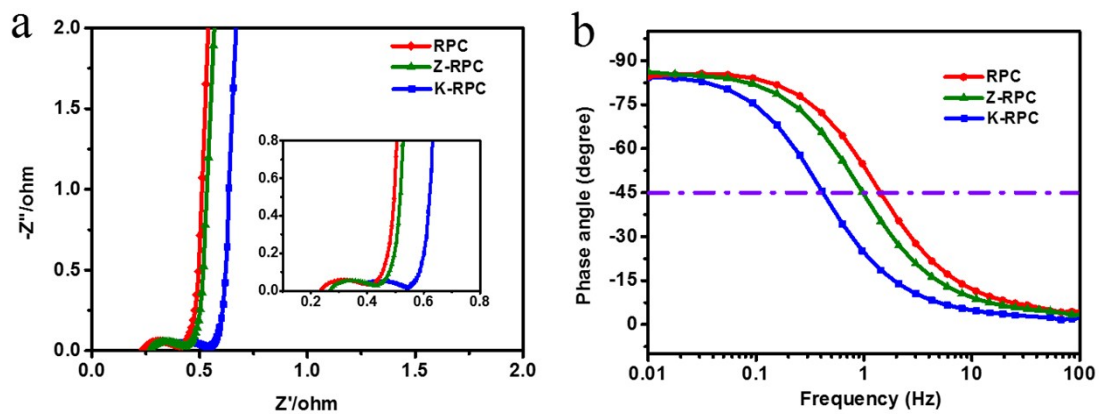

**Figure S12.** (a) Nyquist plots of RPC, Z-RPC and K-RPC. (b) Bode plots of RPC, Z-RPC and K-RPC.

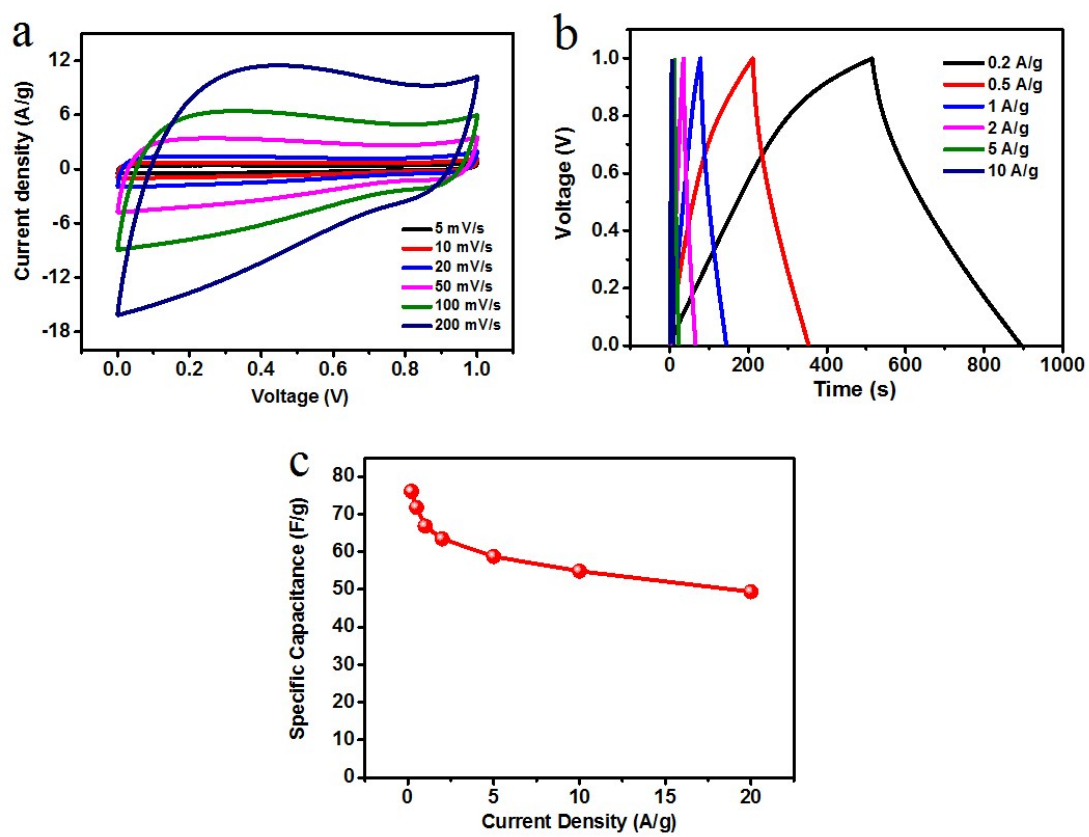

**Figure S13.** (a) CV curves of RPC at a different scan rate in two electrode system using 6.0 M KOH solution. (b) GCD curves of RPC at different current density in two electrode system using 6.0 M KOH solution. (c) Specific capacitances of RPC at different current densities in two electrode system using 6.0 M KOH solution.

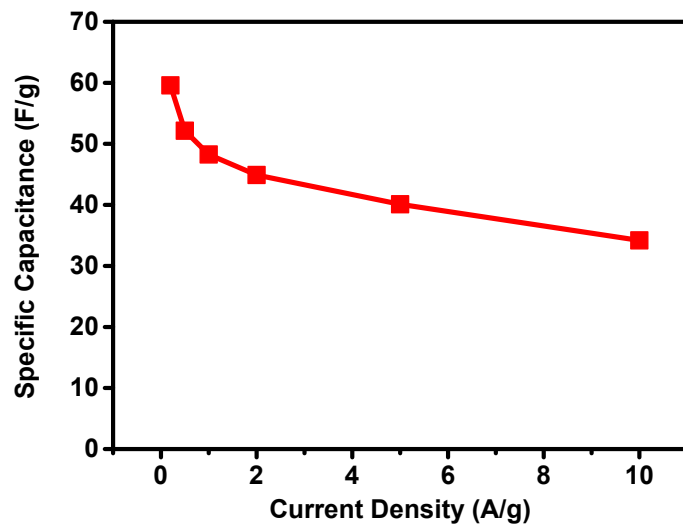

**Figure S14.** Specific capacitances of RPC at different current densities in two electrode system using 1.0 M Na<sub>2</sub>SO<sub>4</sub> solution.

**Table S1.** The preparation condition of the samples.

| Sample       | Raw biomass   | Activation agent  | Carbonization (at 900 °C) | Acid wash |
|--------------|---------------|-------------------|---------------------------|-----------|
| RPC          | rape pollen   | CuCl <sub>2</sub> | √                         | √         |
| Z-RPC        | rape pollen   | ZnCl <sub>2</sub> | √                         | √         |
| K-RPC        | rape pollen   | KOH               | √                         | √         |
| Blank sample | rape pollen   | ×                 | √                         | √         |
| WAW-RPC      | rape pollen   | CuCl <sub>2</sub> | √                         | ×         |
| WAW-RPC-CuCl | rape pollen   | CuCl              | √                         | ×         |
| RPC-CuCl     | rape pollen   | CuCl              | √                         | √         |
| CSC          | coconut shell | CuCl <sub>2</sub> | √                         | √         |

The √ represents the sample have treated with the condition, the × is the opposite.



**Table S2.** Porosity parameters and electrochemical performances of the as-prepared samples.

| Samples         | Yield <sup>[a]</sup><br>(%) | S <sub>BET</sub> <sup>(b)</sup><br>[m <sup>2</sup> g <sup>-1</sup> ] | S <sub>micro</sub> <sup>(c)</sup><br>[m <sup>2</sup> g <sup>-1</sup> ] | S <sub>micro</sub> /S <sub>BET</sub> <sup>(d)</sup> | V <sub>t</sub> <sup>(e)</sup><br>[cm <sup>3</sup> g <sup>-1</sup> ] | V <sub>micro</sub> <sup>(f)</sup><br>[cm <sup>3</sup> g <sup>-1</sup> ] | D <sub>HK</sub> <sup>(g)</sup><br>[nm] | D <sub>BJH</sub> <sup>(h)</sup><br>[nm] | Gravimetric<br>Capacitance<br>(F g <sup>-1</sup> ) <sup>(i)</sup> |
|-----------------|-----------------------------|----------------------------------------------------------------------|------------------------------------------------------------------------|-----------------------------------------------------|---------------------------------------------------------------------|-------------------------------------------------------------------------|----------------------------------------|-----------------------------------------|-------------------------------------------------------------------|
| RPC             | 37.6                        | 2488                                                                 | 2120                                                                   | 0.85                                                | 1.14                                                                | 0.83                                                                    | 0.81                                   | 2.65                                    | 390                                                               |
| Z-RPC           | 28.3                        | 1012                                                                 | 541                                                                    | 0.53                                                | 1.04                                                                | 0.24                                                                    | 0.87                                   | 4.99                                    | 170                                                               |
| K-RPC           | 1.4                         | 2016                                                                 | 1466                                                                   | 0.72                                                | 1.09                                                                | 0.63                                                                    | 0.85                                   | 2.81                                    | 195                                                               |
| Blank<br>sample | 24.4                        | 2.2                                                                  | 0                                                                      | 0                                                   | -                                                                   | -                                                                       | -                                      | -                                       | 27                                                                |
| RPC-CuCl        | 35.2                        | 1783                                                                 | 1256                                                                   | 0.70                                                | 0.81                                                                | 0.49                                                                    | 0.80                                   | 2.2                                     | -                                                                 |
| CSC             | 19.9                        | 2651                                                                 | 2217                                                                   | 0.83                                                | 1.16                                                                | 0.86                                                                    | 0.86                                   | 2.6                                     | 283                                                               |

(a) The yield of the activated carbon.

(b) Specific surface area from multiple BET (Brunauer–Emmett–Teller) method.

(c) Micropore surface area from t-plot method.

(d) The ratio of micropores specific surface area.

(e) Total pore volume at P/P<sub>0</sub>= 0.99.

(f) The volume of micropores was determined by t-plot method.

(g) D<sub>HK</sub> represents the median micropore size by the Horvath-Kawazoe (HK) method.

(h) D<sub>BJH</sub> stands for the Barrett-Joyner-Halenda (BJH) desorption average pore width.

(i) At a current density of 0.5 A g<sup>-1</sup>.

**Table S3** Comparison of CuCl<sub>2</sub> activation with the previously reported activating methods.

| Activation agent                | Raw materials           | S <sub>BET</sub> (m <sup>2</sup> g <sup>-1</sup> ) | Gravimetric Capacitance (F g <sup>-1</sup> ) | Measurement Condition                                       | Ref. |
|---------------------------------|-------------------------|----------------------------------------------------|----------------------------------------------|-------------------------------------------------------------|------|
| KOH                             | Lignin                  | 2218                                               | 312                                          | 6 M KOH<br>1 A g <sup>-1</sup>                              | S1   |
| KOH                             | Cellulose               | 2457                                               | 236                                          | 1M TEABF <sub>4</sub> /AN<br>1 mV s <sup>-1</sup>           | S2   |
| KOH                             | Starch                  | 1510                                               | 194                                          | 30 wt.% KOH<br>1 A g <sup>-1</sup>                          | S3   |
| KOH                             | Coconut shell           | 1356                                               | -                                            | -                                                           | S4   |
| KOH                             | Rape pollen             | 2756                                               | 176                                          | Neat EMIMBF <sub>4</sub><br>1 A g <sup>-1</sup>             | S5   |
| KOH                             | Moringa oleifera branch | 2312                                               | 355                                          | 6 M KOH<br>0.5 A g <sup>-1</sup>                            | S6   |
| KOH                             | Willow Catkins          | 1775                                               | 292                                          | 6 M KOH<br>1 A g <sup>-1</sup>                              | S7   |
| KOH                             | Chitosan                | 2435                                               | 291                                          | 6 M KOH<br>0.2 A g <sup>-1</sup>                            | S8   |
| KOH                             | Pumpkin                 | 2968                                               | 419                                          | 6 M KOH<br>0.5 A g <sup>-1</sup>                            | S9   |
| KOH                             | sunflower seed shell    | 2585                                               | 311                                          | 6 M KOH<br>0.25 A g <sup>-1</sup>                           | S10  |
| KOH                             | Wheat straw             | 2316                                               | 251                                          | MeEt3NBF <sub>4</sub> /AN<br>2 mV s <sup>-1</sup>           | S11  |
| K <sub>2</sub> CO <sub>3</sub>  | Chitosan                | 1013                                               | 246                                          | 3 M KOH<br>0.5 A g <sup>-1</sup>                            | S12  |
| K <sub>2</sub> CO <sub>3</sub>  | Reed Black Liquor       | 1395                                               | -                                            | -                                                           | S13  |
| K <sub>2</sub> CO <sub>3</sub>  | Glucose                 | 2150                                               | -                                            | -                                                           | S14  |
| KHCO <sub>3</sub>               | Glucose                 | 2230                                               | 246                                          | 1 M H <sub>2</sub> SO <sub>4</sub><br>0.1 A g <sup>-1</sup> | S14  |
| NaOH                            | Rice husk               | 1886                                               | 214                                          | 3 M KCl<br>-                                                | S15  |
| Na <sub>2</sub> CO <sub>3</sub> | Chitosan                | 440                                                | -                                            | -                                                           | S16  |
| NaHCO <sub>3</sub>              | Bluestem                | 552                                                | 220                                          | 6 M KOH<br>0.1 A g <sup>-1</sup>                            | S17  |

|                                      |                           |      |     |                                                              |                      |
|--------------------------------------|---------------------------|------|-----|--------------------------------------------------------------|----------------------|
| ZnCl <sub>2</sub>                    | Chitosan                  | 1582 | 252 | 6 M KOH<br>0.5 A g <sup>-1</sup>                             | S18                  |
| ZnCl <sub>2</sub>                    | Coconut shell             | 1266 | -   | -                                                            | S19                  |
| ZnCl <sub>2</sub>                    | Spider silk               | 721  | -   | -                                                            | S20                  |
| ZnCl <sub>2</sub> +FeCl <sub>3</sub> | Moringa<br>oleifera stems | 2250 | 283 | 6 M KOH<br>0.5 A g <sup>-1</sup>                             | S21                  |
| ZnCl <sub>2</sub> +FeCl <sub>3</sub> | Silk                      | 2494 | 242 | EMIMBF <sub>4</sub><br>0.1 A g <sup>-1</sup>                 | S22                  |
| ZnCl <sub>2</sub> +FeCl <sub>3</sub> | Coconut shell             | 1874 | 268 | 6 M KOH<br>1 A g <sup>-1</sup>                               | S23                  |
| ZnCl <sub>2</sub> +KCl               | Glucose                   | 2160 | 206 | 6 M KOH<br>5 mV s <sup>-1</sup>                              | S24                  |
| CO <sub>2</sub>                      | Coconut shell             | 1667 | -   | -                                                            | S25                  |
| CO <sub>2</sub>                      | Chitosan                  | 1054 | 194 | 1 M H <sub>2</sub> SO <sub>4</sub><br>0.2 A g <sup>-1</sup>  | S26                  |
| NH <sub>3</sub>                      | Typha orientalis          | 898  | -   | -                                                            | S27                  |
| NH <sub>3</sub>                      | Cellulose                 | 1326 | -   | -                                                            | S28                  |
| Steam                                | Coconut shell             | 1559 | 228 | 6 M KOH<br>5 mV s <sup>-1</sup>                              | S29                  |
| Steam                                | Wood                      | 1131 | 142 | 0.5 M H <sub>2</sub> SO <sub>4</sub><br>3 mA cm <sup>2</sup> | S30                  |
| KOH+CO <sub>2</sub>                  | Coconut shell             | 1026 | -   | -                                                            | S31                  |
| K <sub>2</sub> FeO <sub>4</sub>      | Bamboo                    | 1732 | 222 | 6 M KOH<br>0.5 A g <sup>-1</sup>                             | S32                  |
| CuCl <sub>2</sub>                    | Rape pollen               | 2488 | 390 | 6 M KOH<br>0.5 A g <sup>-1</sup>                             | <b>This<br/>work</b> |

**Table S4.** Contents of C1s, O1s, N1s and S2p of the as-resulted samples.

| Samples      | XPS (atom %) |       |      |      | Element analysis (wt %) |      |     |     |
|--------------|--------------|-------|------|------|-------------------------|------|-----|-----|
|              | C            | O     | N    | S    | C                       | O    | N   | S   |
| RPC          | 81.4         | 13.6  | 4.0  | 0.5  | 65.8                    | 25.1 | 4.0 | 1.1 |
| Z-RPC        | 83.2         | 12.9  | 3.0  | 0.4  | 78.3                    | 15.2 | 3.2 | 1.0 |
| K-RPC        | 91.1         | 8.7   | 0    | 0    | 89.1                    | 6.4  | 0.1 | 0.5 |
| Blank sample | 94.4         | 3.57  | 1.67 | 0.33 | 71.0                    | 23.9 | 3.7 | 0.3 |
| CSC          | 85.05        | 14.79 | 0    | 0    | 71.4                    | 26.8 | 0   | 0   |

## References.

1. L. Zhang, T. You, T. Zhou, X. Zhou and F. Xu, *ACS applied materials & interfaces*, 2016, **8**, 13918-13925.
2. L. Wei, M. Sevilla, A. B. Fuertes, R. Mokaya and G. Yushin, *Advanced Energy Materials*, 2011, **1**, 356-361.
3. Q. Li, H. Wang, Q. Dai, J. Yang and Y. Zhong, *Solid State Ionics*, 2008, **179**, 269-273.
4. K. Y. Foo and B. H. Hameed, *Chemical Engineering Journal*, 2012, **184**, 57-65.
5. L. Zhang, F. Zhang, X. Yang, K. Leng, Y. Huang and Y. Chen, *Small*, 2013, **9**, 1342-1347.
6. Y. Cai, Y. Luo, Y. Xiao, X. Zhao, Y. Liang, H. Hu, H. Dong, L. Sun, Y. Liu and M. Zheng, *ACS applied materials & interfaces*, 2016, **8**, 33060-33071.
7. L. Xie, G. Sun, F. Su, X. Guo, Q. Kong, X. Li, X. Huang, L. Wan, K. Li and C. Lv, *Journal of Materials Chemistry A*, 2016, **4**, 1637-1646.
8. P. Hao, Z. Zhao, Y. Leng, J. Tian, Y. Sang, R. I. Boughton, C. P. Wong, H. Liu and B. Yang, *Nano Energy*, 2015, **15**, 9-23.
9. G. Sun, B. Li, J. Ran, X. Shen and H. Tong, *Electrochimica Acta*, 2015, **171**, 13-22.

10. X. Li, W. Xing, S. Zhuo, J. Zhou, F. Li, S. Z. Qiao and G. Q. Lu, *Bioresour Technol*, 2011, **102**, 1118-1123.
11. X. Li, C. Han, X. Chen and C. Shi, *Microporous and Mesoporous Materials*, 2010, **131**, 303-309.
12. F. Zhang, T. Liu, G. Hou, T. Kou, L. Yue, R. Guan and Y. Li, *Nano Research*, 2016, **9**, 2875-2888.
13. Y. Sun, J. P. Zhang, G. Yang and Z. H. Li, *Environ Technol*, 2007, **28**, 491-497.
14. M. Sevilla and A. B. Fuertes, *ChemSusChem*, 2016, **9**, 1880-1888.
15. Y. Guo, J. Qi, Y. Jiang, S. Yang, Z. Wang and H. Xu, *Materials Chemistry and Physics*, 2003, **80**, 704-709.
16. A. Kucinska, A. Cyganiuk and J. P. Lukaszewicz, *Carbon*, 2012, **50**, 3098-3101.
17. H. Jin, X. Wang, Z. Gu, J. D. Hoefelmeyer, K. Muthukumarappan and J. Julson, *RSC Advances*, 2014, **4**.
18. X. Deng, B. Zhao, L. Zhu and Z. Shao, *Carbon*, 2015, **93**, 48-58.
19. D. C. S. Azevedo, J. C. S. Araújo, M. Bastos-Neto, A. E. B. Torres, E. F. Jaguaribe and C. L. Cavalcante, *Microporous and Mesoporous Materials*, 2007, **100**, 361-364.
20. L. Zhou, P. Fu, X. Cai, S. Zhou and Y. Yuan, *Applied Catalysis B: Environmental*, 2016, **188**, 31-38.
21. Y. Cai, Y. Luo, H. Dong, X. Zhao, Y. Xiao, Y. Liang, H. Hu, Y. Liu and M. Zheng, *Journal of Power Sources*, 2017, **353**, 260-269.
22. J. Hou, C. Cao, F. Idrees and X. Ma, *ACS nano*, 2015, **9**, 2556-2564.
23. L. Sun, C. Tian, M. Li, X. Meng, L. Wang, R. Wang, J. Yin and H. Fu, *Journal of Materials Chemistry A*, 2013, **1**, 6462.
24. J. Pampel, C. Denton and T.-P. Fellingner, *Carbon*, 2016, **107**, 288-296.
25. K. Yang, J. Peng, H. Xia, L. Zhang, C. Srinivasakannan and S. Guo, *Journal of the Taiwan Institute of Chemical Engineers*, 2010, **41**, 367-372.
26. A. Śliwak, N. Díez, E. Miniach and G. Gryglewicz, *Journal of Applied Electrochemistry*, 2016, **46**, 667-677.
27. P. Chen, L.-K. Wang, G. Wang, M.-R. Gao, J. Ge, W.-J. Yuan, Y.-H. Shen, A.-J. Xie and S.-H. Yu, *Energy Environ. Sci.*, 2014, **7**, 4095-4103.
28. W. Luo, B. Wang, C. G. Heron, M. J. Allen, J. Morre, C. S. Maier, W. F. Stickle and X. Ji, *Nano Lett*, 2014, **14**, 2225-2229.
29. J. Mi, X.-R. Wang, R.-J. Fan, W.-H. Qu and W.-C. Li, *Energy & Fuels*, 2012, **26**, 5321-5329.
30. F.-C. Wu, R.-L. Tseng, C.-C. Hu and C.-C. Wang, *Journal of Power Sources*, 2006, **159**, 1532-1542.
31. A. T. Mohd Din, B. H. Hameed and A. L. Ahmad, *J Hazard Mater*, 2009, **161**, 1522-1529.
32. Y. Gong, D. Li, C. Luo, Q. Fu and C. Pan, *Green Chemistry*, 2017, **19**, 4132-4140.
